# Supplementary material for: Non-Invasive Wildlife Disease Surveillance Using Real Time PCR Assays: The Case of the Endangered Galemys pyrenaicus Populations from the Central System Mountains (Extremadura, Spain)
Source: MDPI journal article supplement (doi:10.3390/ani13071136), 2023-03-23
Supplement: s1 [file s1]

Supplementary material

Tables S1: Real time PCR Target species (validated and “in silico” according to manufacturers (personal communication))

| Targeted species           | Range of target species                                                                                                                                                                                                                                                                                                                                                                        |                                                                                                                                                                                                                                                                                          |
|----------------------------|------------------------------------------------------------------------------------------------------------------------------------------------------------------------------------------------------------------------------------------------------------------------------------------------------------------------------------------------------------------------------------------------|------------------------------------------------------------------------------------------------------------------------------------------------------------------------------------------------------------------------------------------------------------------------------------------|
|                            | Validated with specific template DNA                                                                                                                                                                                                                                                                                                                                                           | <i>in silico</i> assayed                                                                                                                                                                                                                                                                 |
| <i>Leptospira</i> spp.     | <i>L. bratislava</i> (Jez Bratislava)<br><i>L. hardjo</i> (Hardjoprajitno and Hardjo Bovis Sponselee),<br><i>L. canicola</i> (Hond Utrecht IV)<br><i>L. pomona</i> (Pomona)<br><i>L. grippotyphosa</i> (Moskva)<br><i>L. icterohaemorrhagiae</i> (RGA)<br><i>L. autumnalis</i> (Akiyami A)<br><i>L. castellonis</i> (Castellón 3).                                                             | <i>Leptospira interrogans</i><br><i>Leptospira kirschneri</i><br><i>Leptospira noguchii</i><br><i>Leptospira alexanderi</i><br><i>Leptospira weilii</i><br><i>Leptospira borgpetersenii</i><br><i>Leptospira santarosai</i><br><i>Leptospira kmetyi</i><br><i>Leptospira mayottensis</i> |
| <i>Listeria</i> spp.       | <i>Listeria monocytogenes</i> ,<br><i>Listeria innocua</i> ,<br><i>Listeria weishimeri</i> ,<br><i>Listeria seeligeri</i> ,<br><i>Listeria ivanovii</i> ,<br><i>Listeria rocuortidae</i> ,<br><i>Listeria marthii</i> .<br><i>Listeria weihenstephanensis</i>                                                                                                                                  |                                                                                                                                                                                                                                                                                          |
| <i>Salmonella</i> spp.     | <i>Serovar paratyphi B</i> (CECT 554)<br><i>Serovar enteritidis</i> (CECT 4396) (1,2)<br><i>Serovar typhimurium</i> (CECT 723) (3,4)<br><i>Serovar typhi</i> (CECT 4138)<br><i>Serovar infantis</i> (NCTC 6703)<br><i>Serovar gallinarum</i> (CECT 4182)<br><i>Serovar pullorum</i> (NCTC 10704)<br><i>Serovar choleraesuis</i> (ATCC 10708)                                                   |                                                                                                                                                                                                                                                                                          |
| <i>Staphylococcus</i> spp. | <i>S. felis</i><br><i>S. nepalensis</i><br><i>S. hominis</i> -5<br><i>S. microti</i> -3<br><i>S. caprae</i> -4<br><i>S. arlettae</i> -5<br><i>S. lentus</i> -6<br><i>S. pasteurii</i><br><i>S. muscae</i> -4<br><i>S. haemolyticus</i> -4<br><i>S. sciuri</i> -2<br><i>S. chromogenes</i> -8<br><i>S. equorum</i> -1<br><i>S. simulans</i> -5<br><i>S. xylosus</i><br><i>S. epidermidis</i> -4 |                                                                                                                                                                                                                                                                                          |

| Targeted species            | Range of target species                                                                                                                                                                                                                            |                                                                                                                                                                                                                                                                                                                                                                                                                                                                                                                                                                                                                                                                                        |
|-----------------------------|----------------------------------------------------------------------------------------------------------------------------------------------------------------------------------------------------------------------------------------------------|----------------------------------------------------------------------------------------------------------------------------------------------------------------------------------------------------------------------------------------------------------------------------------------------------------------------------------------------------------------------------------------------------------------------------------------------------------------------------------------------------------------------------------------------------------------------------------------------------------------------------------------------------------------------------------------|
|                             | Validated with specific template DNA                                                                                                                                                                                                               | <i>in silico</i> assayed                                                                                                                                                                                                                                                                                                                                                                                                                                                                                                                                                                                                                                                               |
|                             | <i>S. aureus-I</i>                                                                                                                                                                                                                                 |                                                                                                                                                                                                                                                                                                                                                                                                                                                                                                                                                                                                                                                                                        |
| <i>Cryptosporidium</i> spp. | <i>C. parvum</i><br><i>C. andersoni</i><br><i>C. hominis</i><br><i>C. serpentis</i><br><i>C. muris</i><br><i>C. tyzzeri</i><br><i>C. ubiquitum</i><br><i>C. ryanae</i>                                                                             | <i>C. apodemi</i><br><i>C. canis</i><br><i>C. cuniculus</i><br><i>C. ditrichi</i><br><i>C. erinacei</i><br><i>C. fayeri</i><br><i>C. galli</i><br><i>C. hominis TU502</i><br><i>C. meleagridis</i><br><i>C. parvum Iowa II</i><br><i>C. ratti</i><br><i>C. estudinis</i><br><i>C. ubiquitum</i><br><i>C. viatorum</i><br><i>C. wrairi</i>                                                                                                                                                                                                                                                                                                                                              |
| <i>Eimeria</i> spp.         | <i>E. tenella</i><br><i>E. acervulina</i><br><i>E. maxima</i><br><i>E. necatrix</i><br><i>E. praecox</i><br><i>E. mitis</i><br><i>E. brunetti</i><br><i>E. ovinoidalis</i><br><i>E. arloingi</i><br><i>E. ninakohlyakimovae</i><br><i>E. magna</i> | <i>E. acervulina</i><br><i>E. adenoides</i><br><i>E. ahsata</i><br><i>E. albamensis</i><br><i>E. arloingi</i><br><i>E. arnyi</i><br><i>E. auburnensis</i><br><i>E. bovis</i><br><i>E. brunetti</i><br><i>E. bukidnonensis</i><br><i>E. canadensis</i><br><i>E. cf. ictidea</i><br><i>E. chapmani</i><br><i>E. coecicola</i><br><i>E. crandallis</i><br><i>E. cylindrica</i><br><i>E. dispersa</i><br><i>E. ellipsoidalis</i><br><i>E. exigua</i><br><i>E. falciformis</i><br><i>E. flavescens</i><br><i>E. gallopavonis</i><br><i>E. granulosa</i><br><i>E. gruis</i><br><i>E. intestinalis</i><br><i>E. irresidua</i><br><i>E. ivitaensis</i><br><i>E. kofoidi</i><br><i>E. lamae</i> |

| Targeted species           | Range of target species                                                                                                           |                                                                                                                                                                                                                                                                                                                                                                                                                                                                                                                                                                                                                        |
|----------------------------|-----------------------------------------------------------------------------------------------------------------------------------|------------------------------------------------------------------------------------------------------------------------------------------------------------------------------------------------------------------------------------------------------------------------------------------------------------------------------------------------------------------------------------------------------------------------------------------------------------------------------------------------------------------------------------------------------------------------------------------------------------------------|
|                            | Validated with specific template DNA                                                                                              | <i>in silico</i> assayed                                                                                                                                                                                                                                                                                                                                                                                                                                                                                                                                                                                               |
|                            |                                                                                                                                   | <i>E. legionensis</i><br><i>E. macusaniensis</i><br><i>E. magna</i><br><i>E. marsica</i><br><i>E. maxima</i><br><i>E. media</i><br><i>E. meleagrimitis</i><br><i>E. mitis</i><br><i>E. necatrix</i><br><i>E. ovina</i><br><i>E. pallida</i><br><i>E. parva</i><br><i>E. perforans</i><br><i>E. piriformis</i><br><i>E. praecox</i><br><i>E. reichenowi</i><br><i>E. stiedai</i><br><i>E. subspherica</i><br><i>E. tenella</i><br><i>E. vejnovskyi</i><br><i>E. weybridgensis</i><br><i>E. wyomingensis</i><br><i>E. zuernii</i><br><i>E. anseris</i><br><i>E. innocua</i><br><i>E. meleagridis</i><br><i>E. caviae</i> |
| family <i>Ascaridoidea</i> | Genus <i>Baylisascaris</i><br>Genus <i>Parascaris</i><br>Genus <i>Ascaris</i><br>Genus <i>Toxascaris</i><br>Genus <i>Toxocara</i> |                                                                                                                                                                                                                                                                                                                                                                                                                                                                                                                                                                                                                        |

Table S2. Species from digenean orders Plagiorchiida and Opisthorchiida used for in silico primer and probe design of 28S rDNA. NCBI: The National Center for Biotechnology Information

| Order          | Super- or Family | Genus                     | Accession Number from NCBI | Species                          |
|----------------|------------------|---------------------------|----------------------------|----------------------------------|
| Opisthorchiida | Acanthocolpidae  | <i>Monostephanostomum</i> | EF506763.1                 | <i>Monostephanostomum nolani</i> |
| Opisthorchiida | Acanthocolpidae  | <i>Neophasis</i>          | MW730773.1-83              | <i>Neophasis oculata</i>         |
| Opisthorchiida | Acanthocolpidae  | <i>Neophasis</i>          | AF151936.1                 | <i>Nephrotrema truncatum</i>     |

| Order          | Super- or Family       | Genus                    | Accession Number from NCBI            | Species                           |
|----------------|------------------------|--------------------------|---------------------------------------|-----------------------------------|
| Opisthorchiida | Acanthocolpidae        | <i>Pleorchis</i>         | DQ248215.1                            | <i>Pleorchis polyorchis</i>       |
| Opisthorchiida | Acanthocolpidae        | <i>Pleorchis</i>         | DQ248216.1                            | <i>Pleorchis uku</i>              |
| Opisthorchiida | Acanthocolpidae        | <i>Pseudolepidapedon</i> | KJ820760.1                            | <i>Pseudolepidapedon balistis</i> |
| Opisthorchiida | Acanthocolpidae        | <i>Tormopsolus</i>       | DQ248217.1                            | <i>Tormopsolus orientalis</i>     |
| Opisthorchiida | Acanthocolpidae        | <i>Stephanostomum</i>    | AY222256.1; DQ248218.1                | <i>Stephanostomum baccatum</i>    |
| Opisthorchiida | Acanthocolpidae        | <i>Stephanostomum</i>    | DQ248225.1                            | <i>Stephanostomum bicoronatum</i> |
| Opisthorchiida | Acanthocolpidae        | <i>Stephanostomum</i>    | DQ248226.1                            | <i>Stephanostomum cestillum</i>   |
| Opisthorchiida | Acanthocolpidae        | <i>Stephanostomum</i>    | DQ248219.1,27                         | <i>Stephanostomum cf uku</i>      |
| Opisthorchiida | Acanthocolpidae        | <i>Stephanostomum</i>    | MW115577.1                            | <i>Stephanostomum cf.</i>         |
| Opisthorchiida | Acanthocolpidae        | <i>Stephanostomum</i>    | DQ248221.1                            | <i>Stephanostomum gaidropsori</i> |
| Opisthorchiida | Acanthocolpidae        | <i>Stephanostomum</i>    | EF506761.1; MK558796.1                | <i>Stephanostomum sp.</i>         |
| Opisthorchiida | Cryptogonimidae        | <i>Acanthostomum</i>     | KC489791.1                            | <i>Acanthostomum burminis</i>     |
| Opisthorchiida | <u>Cryptogonimidae</u> | <i>Acanthostomum</i>     | MK648271.1                            | <i>Acanthostomum minimum</i>      |
| Opisthorchiida | <u>Cryptogonimidae</u> | <i>Acanthostomum</i>     | KC489792.1                            | <i>Acanthostomum sp.</i>          |
| Opisthorchiida | Cryptogonimidae        | <i>Mitotrema</i>         | AY222229.1                            | <i>Mitotrema anthostomatium</i>   |
| Opisthorchiida | Cryptogonimidae        | <i>Neocladocystis</i>    | MN705808.1                            | <i>Neocladocystis bamba</i>       |
| Opisthorchiida | Cryptogonimidae        | <i>Neocladocystis</i>    | MN705809.1                            | <i>Neocladocystis biliaris</i>    |
| Opisthorchiida | Cryptogonimidae        | <i>Neocladocystis</i>    | MN705810.1                            | <i>Neocladocystis sp.</i>         |
| Opisthorchiida | Cryptogonimidae        | <i>Neocladocystis</i>    | AF300330.1                            | <i>Neoglyphe locellus</i>         |
| Opisthorchiida | Cryptogonimidae        | <i>Stemmatostoma</i>     | MN688143.1                            | <i>Stemmatostoma sp.</i>          |
| Opisthorchiida | Opisthorchiidae        | <i>Clonorchis</i>        | MK450523.1-27; MF099784.1; JF823989.1 | <i>Clonorchis sinensis</i>        |
| Opisthorchiida | Opisthorchiidae        | <i>Metorchis</i>         | MK482051.1-55                         | <i>Metorchis orientalis</i>       |

| Order          | Super- or Family | Genus                   | Accession Number from NCBI           | Species                           |
|----------------|------------------|-------------------------|--------------------------------------|-----------------------------------|
| Opisthorchiida | Opisthorchiidae  | <i>Metorchis</i>        | KY075772.1-77                        | <i>Metorchis sp.</i>              |
| Opisthorchiida | Heterophyidae    | <i>Cryptocotyle</i>     | MH025622.1-23                        | <i>Cryptocotyle lata</i>          |
| Opisthorchiida | Heterophyidae    | <i>Cryptocotyle</i>     | MW361240.1; AY222228.1               | <i>Cryptocotyle lingua</i>        |
| Opisthorchiida | Heterophyidae    | <i>Euryhormis</i>       | AB521800.1,97,99                     | <i>Euryhormis costaricensis</i>   |
| Opisthorchiida | Heterophyidae    | <i>Procerovum</i>       | HM004179.1                           | <i>Procerovum cheni</i>           |
| Opisthorchiida | Heterophyidae    | <i>Procerovum</i>       | HM004182.1                           | <i>Procerovum varium</i>          |
| Opisthorchiida | Heterophyidae    | <i>Scaphanocephalus</i> | MT461356.1; MN160569.1-70            | <i>Scaphanocephalus sp.</i>       |
| Opisthorchiida | Heterophyidae    | <i>Apophallus</i>       | MG806918.1                           | <i>Apophallus zalophi</i>         |
| Opisthorchiida | Heterophyidae    | <i>Ascocotyle</i>       | MK359080.1                           | <i>Ascocotyle cameliae</i>        |
| Opisthorchiida | Heterophyidae    | <i>Centrocestus</i>     | KY075663.1-65                        | <i>Centrocestus formosanus</i>    |
| Opisthorchiida | Heterophyidae    | <i>Centrocestus</i>     | HQ874609.1                           | <i>Centrocestus formosanus</i>    |
| Opisthorchiida | Heterophyidae    | <i>Centrocestus</i>     | LC599535.1-36                        | <i>Centrocestus spp.</i>          |
| Opisthorchiida | Heterophyidae    | <i>Haplorchis</i>       | MN745941.1; KX815125.1               | <i>Haplorchis pumilio</i>         |
| Opisthorchiida | Heterophyidae    | <i>Haplorchis</i>       | HM004177.1,92                        | <i>Haplorchis yokogawai</i>       |
| Opisthorchiida | Heterophyidae    | <i>Metagonimoides</i>   | JQ995473.1                           | <i>Metagonimoides oregonensis</i> |
| Opisthorchiida | Heterophyidae    | <i>Metagonimus</i>      | HQ832633.1                           | <i>Metagonimus miyatai</i>        |
| Opisthorchiida | Heterophyidae    | <i>Metagonimus</i>      | MF407172.1-73                        | <i>Metagonimus pusillus</i>       |
| Opisthorchiida | Heterophyidae    | <i>Metagonimus</i>      | LC599529.1,30,32-34,46-47;LC422950.1 | <i>Metagonimus sp.</i>            |
| Opisthorchiida | Heterophyidae    | <i>Metagonimus</i>      | KX387456.1-60                        | <i>Metagonimus suifunensis</i>    |
| Opisthorchiida | Heterophyidae    | <i>Metagonimus</i>      | HQ832636.1                           | <i>Metagonimus takahashii</i>     |

| Order          | Super- or Family        | Genus                    | Accession Number from NCBI | Species                              |
|----------------|-------------------------|--------------------------|----------------------------|--------------------------------------|
| Opisthorchiida | Heterophyidae           | <i>Metagonimus</i>       | HQ832639.1                 | <i>Metagonimus yokogawai</i>         |
| Opisthorchiida | Heterophyidae           | <i>Phocitrema</i>        | MG806921.1                 | <i>Phocitrema fusiforme</i>          |
| Opisthorchiida | Opisthorchiidae         | <i>Erschoviorchis</i>    | MK877245.1-49              | <i>Erschoviorchis anuiensis</i>      |
| Opisthorchiida | Opisthorchiidae         | <i>Opisthorchiidae</i>   | MN726966.1                 | <i>Opisthorchiidae</i> gen. sp.      |
| Opisthorchiida | Opisthorchiidae         | <i>Opisthorchis</i>      | MF099790.1                 | <i>Opisthorchis felineus</i>         |
| Opisthorchiida | Opisthorchiidae         | <i>Opisthorchis</i>      | MF110001.1                 | <i>Opisthorchis</i> sp.              |
| Opisthorchiida | Opisthorchiidae         | <i>Opisthorchis</i>      | JF823990.1; HM004188.1     | <i>Opisthorchis viverrini</i>        |
| Plagiorchiida  | Atractotrematidae       | <i>Isorchis</i>          | MF803157.1                 | <i>Isorchis currani</i>              |
| Plagiorchiida  | Auridistomidae          | <i>Auridistomum</i>      | AY116872.1                 | <i>Auridistomum chelydrae</i>        |
| Plagiorchiida  | Batrachotrematidae      | <i>Opisthioparorchis</i> | MZ682029.1                 | <i>Opisthioparorchis</i> sp.         |
| Plagiorchiida  | Brachycladiidae         | <i>Brachycladium</i>     | KR703279.1                 | <i>Brachycladium goliath</i>         |
| Plagiorchiida  | Brachycladiidae         | <i>Orthosplanchnus</i>   | MF611697.1                 | <i>Orientocreadium pseudobagri</i>   |
| Plagiorchiida  | Brachycladiidae         | <i>Orthosplanchnus</i>   | MT153593.1                 | <i>Orthosplanchnus arcticus</i>      |
| Plagiorchiida  | Brachycladiidae         | <i>Synthesium</i>        | MN295480.1                 | <i>Synthesium delamurei</i>          |
| Plagiorchiida  | Brachycladiidae         | <i>Synthesium</i>        | MN295482.1-86              | <i>Synthesium neotropiale</i>        |
| Plagiorchiida  | Brachycladiidae         | <i>Synthesium</i>        | MN295487.1                 | <i>Synthesium pontoporae</i>         |
| Plagiorchiida  | Brachycladiidae         | <i>Synthesium</i>        | MN295481.1                 | <i>Synthesium seymouri</i>           |
| Plagiorchiida  | Brachycladiidae         | <i>Synthesium</i>        | MN295488.1-89,92-94,97-99  | <i>Synthesium tursionis</i>          |
| Plagiorchiida  | Brachycladiidae         | <i>Synthesium</i>        | MN295500.1                 | <i>Synthesium tursionis</i>          |
| Plagiorchiida  | Brachycladiidae         | <i>Unclassified</i>      | MT153594.1                 | <i>Brachycladiidae</i> gen. sp.      |
| Plagiorchiida  | Brachycladiidae         | <i>Zalophotrema</i>      | AY222255.1                 | <i>Zalophotrema hepaticum</i>        |
| Plagiorchiida  | Brachycoeliidae         | <i>Brachycoelium</i>     | AF151935.1                 | <i>Brachycoelium salamandrae</i>     |
| Plagiorchiida  | Brachycoeliidae         | <i>Mesocoelium</i>       | AY222277.1                 | <i>Mesocoelium</i> sp.               |
| Plagiorchiida  | Brachycoeliidae         | <i>Parabrachycoelium</i> | HQ165754.1                 | <i>Parabrachycoelium longicaecum</i> |
| Plagiorchiida  | Cephalogonimidae        | <i>Cephalogonimus</i>    | AY222276.1                 | <i>Cephalogonimus retusus</i>        |
| Plagiorchiida  | <u>Cephalogonimidae</u> | <i>Cephalogonimus</i>    | MK986866.1-67              | <i>Cercaria baushii</i>              |

| Order         | Super- or Family        | Genus                 | Accession Number from NCBI | Species                           |
|---------------|-------------------------|-----------------------|----------------------------|-----------------------------------|
| Plagiorchiida | <u>Cephalogonimidae</u> | <i>Cephalogonimus</i> | MK986859.1,63-64           | <i>Cercaria cristatella</i>       |
| Plagiorchiida | <u>Cephalogonimidae</u> | <i>Cephalogonimus</i> | MT216312.1                 | <i>Cercaria cristatella</i>       |
| Plagiorchiida | <u>Cephalogonimidae</u> | <i>Cephalogonimus</i> | MK259981.1                 | <i>Cercaria nigrospora</i>        |
| Plagiorchiida | <u>Cephalogonimidae</u> | <i>Cephalogonimus</i> | MK986861.1                 | <i>Cercaria vorskla</i>           |
| Plagiorchiida | Choanocotylidae         | <i>Choanocotyle</i>   | MW686389.1, 92-93          | <i>Choanocotyle hobbsi</i>        |
| Plagiorchiida | Choanocotylidae         | <i>Choanocotyle</i>   | EU196356.1                 | <i>Choanocotyle hobbsi</i>        |
| Plagiorchiida | Choanocotylidae         | <i>Choanocotyle</i>   | AY116865.1                 | <i>Choanocotyle hobbsi</i>        |
| Plagiorchiida | Choanocotylidae         | <i>Choanocotyle</i>   | AY116862.1;EU196358.1      | <i>Choanocotyle nematoides</i>    |
| Plagiorchiida | Choanocotylidae         | <i>Choanocotyle</i>   | EU196355.1                 | <i>Choanocotyle platti</i>        |
| Plagiorchiida | Collyriclidae           | <i>Collyriclum</i>    | JQ231122.1                 | <i>Collyriclum faba</i>           |
| Plagiorchiida | Cortrematidae           | <i>Cortrema</i>       | KJ700420.1                 | <i>Cortrema magnicaudata</i>      |
| Plagiorchiida | Dicrocoeliidae          | <i>Infidum</i>        | MW317227.1,30              | <i>Infidum infidum</i>            |
| Plagiorchiida | Dicrocoeliidae          | <i>Infidum</i>        | KU726884.1-85              | <i>Infidum similis</i>            |
| Plagiorchiida | Haematoloechidae        | <i>Haematoloechus</i> | KY921598.1                 | <i>Gyrabascus sp.</i>             |
| Plagiorchiida | Haematoloechidae        | <i>Haematoloechus</i> | AF184251.1                 | <i>Haematoloechus abbreviatus</i> |
| Plagiorchiida | Haematoloechidae        | <i>Haematoloechus</i> | AF151934.1                 | <i>Haematoloechus asper</i>       |
| Plagiorchiida | Haematoloechidae        | <i>Haematoloechus</i> | AF387800.1                 | <i>Haematoloechus breviplexus</i> |
| Plagiorchiida | Haematoloechidae        | <i>Haematoloechus</i> | AF387797.1                 | <i>Haematoloechus complexus</i>   |
| Plagiorchiida | Haematoloechidae        | <i>Haematoloechus</i> | AY222280.1; AF387801.1     | <i>Haematoloechus longiplexus</i> |
| Plagiorchiida | Haematoloechidae        | <i>Haematoloechus</i> | AF387799.1                 | <i>Haematoloechus medioplexus</i> |
| Plagiorchiida | Haematoloechidae        | <i>Haematoloechus</i> | MN969620.1                 | <i>Haematoloechus sp.</i>         |
| Plagiorchiida | Haematoloechidae        | <i>Haematoloechus</i> | AF151916.1                 | <i>Haematoloechus variegatus</i>  |
| Plagiorchiida | Haematoloechidae        | <i>Haematoloechus</i> | AF387798.1                 | <i>Haematoloechus varioplexus</i> |
| Plagiorchiida | Haploporidae            | <i>Forticulcita</i>   | MT957804.1-21              | <i>Forticulcita minuta</i>        |

| Order         | Super- or Family  | Genus                  | Accession Number from NCBI | Species                               |
|---------------|-------------------|------------------------|----------------------------|---------------------------------------|
| Plagiorchiida | Haploporidae      | <i>Saccocoelioides</i> | MG925108.1                 | <i>Saccocoelioides elongatus</i>      |
| Plagiorchiida | Haploporidae      | <i>Saccocoelioides</i> | MG925112.1                 | <i>Saccocoelioides magnus</i>         |
| Plagiorchiida | Haploporidae      | <i>Dicrogaster</i>     | FJ211261.1                 | <i>Dicrogaster contracta</i>          |
| Plagiorchiida | Haploporidae      | <i>Megasolena</i>      | MH244121.1                 | <i>Megasolena hysterospina</i>        |
| Plagiorchiida | Haploporidae      | <i>Megasolena</i>      | MH244122.1, LC626476.1-77  | <i>Megasolena</i> sp.                 |
| Plagiorchiida | Lecithodendriidae | <i>Gyrabascus</i>      | MK575195.1                 | <i>Gyrabascus oppositus</i>           |
| Plagiorchiida | Lecithodendriidae | <i>Loxogenes</i>       | KX712084.1-85              | <i>Longiductotrema tethepae</i>       |
| Plagiorchiida | Lecithodendriidae | <i>Loxogenes</i>       | AY220624.1                 | <i>Loxogenes macrocirra</i>           |
| Plagiorchiida | Lecithodendriidae | <i>Ophiosacculus</i>   | AF480167.1                 | <i>Ophiosacculus mehelyi</i>          |
| Plagiorchiida | Lepocreadiidae    | <i>Tetracerasta</i>    | FJ788494.1                 | <i>Tetracerasta blepta</i>            |
| Plagiorchiida | Liliatrematidae   | <i>Liliatrema</i>      | MT303944.1-45              | <i>Liliatrema skrjabini</i>           |
| Plagiorchiida | Macroderoididae   | <i>Alloglossidium</i>  | MH041415.1-17              | <i>Alloglossidium hamrumi</i>         |
| Plagiorchiida | Macroderoididae   | <i>Alloglossidium</i>  | MH041418.1                 | <i>Alloglossidium hirudicola</i>      |
| Plagiorchiida | Macroderoididae   | <i>Alloglossidium</i>  | MH041413.1-14              | <i>Alloglossidium macrobdellensis</i> |
| Plagiorchiida | Macroderoididae   | <i>Alloglossidium</i>  | MH041419.1-20              | <i>Alloglossidium schmidtii</i>       |
| Plagiorchiida | Macroderoididae   | <i>Alloglossidium</i>  | MH041421.1-22              | <i>Alloglossidium</i> sp.             |
| Plagiorchiida | Macroderoididae   | <i>Alloglossidium</i>  | MH041423.1-24              | <i>Alloglossidium turnbulli</i>       |
| Plagiorchiida | Macroderoididae   | <i>Macroderoides</i>   | HQ680851.1                 | <i>Macroderoides flavus</i>           |
| Plagiorchiida | Macroderoididae   | <i>Macroderoides</i>   | HQ680850.1                 | <i>Macroderoides</i> sp.              |
| Plagiorchiida | Macroderoididae   | <i>Macroderoides</i>   | EU850400.1,03; AF433674.1  | <i>Macroderoides spiniferus</i>       |
| Plagiorchiida | Macroderoididae   | <i>Macroderoides</i>   | EU850398.1                 | <i>Macroderoides texanus</i>          |
| Plagiorchiida | Macroderoididae   | <i>Macroderoides</i>   | EU850406.1                 | <i>Macroderoides trilobatus</i>       |
| Plagiorchiida | Macroderoididae   | <i>Macroderoides</i>   | HQ680846.1; AF433673.1     | <i>Macroderoides typicus</i>          |
| Plagiorchiida | Microphallidae    | <i>Floridatrema</i>    | AY220632.1                 | <i>Floridatrema heardi</i>            |
| Plagiorchiida | Microphallidae    | <i>Levinseniella</i>   | MG783585.1                 | <i>Levinseniella</i> sp.              |
| Plagiorchiida | Microphallidae    | <i>Levinseniella</i>   | KY752116.1                 | <i>Leyogonimus polyoon</i>            |



| Order         | Super- or Family | Genus                    | Accession Number from NCBI            | Species                                |
|---------------|------------------|--------------------------|---------------------------------------|----------------------------------------|
| Plagiorchiida | Microphallidae   | <i>Microphallidae</i>    | KT355820.1-21; AB974360.1; KX022509.1 | <i>Microphallidae</i> sp.              |
| Plagiorchiida | Microphallidae   | <i>Atriophallophorus</i> | MN342153.1-54                         | <i>Atriophallophorus winterbourni</i>  |
| Plagiorchiida | Microphallidae   | <i>Candidotrema</i>      | AY220621.1                            | <i>Candidotrema loossi</i>             |
| Plagiorchiida | Microphallidae   | <i>Maritrema</i>         | AY220629.1                            | <i>Maritrema arenaria</i>              |
| Plagiorchiida | Microphallidae   | <i>Maritrema</i>         | KT355818.1                            | <i>Maritrema brevisacciferum</i>       |
| Plagiorchiida | Microphallidae   | <i>Maritrema</i>         | KT880221.1-23                         | <i>Maritrema corai</i>                 |
| Plagiorchiida | Microphallidae   | <i>Maritrema</i>         | KJ144173.1                            | <i>Maritrema deblocki</i>              |
| Plagiorchiida | Microphallidae   | <i>Maritrema</i>         | JF826247.1                            | <i>Maritrema eroliae</i>               |
| Plagiorchiida | Microphallidae   | <i>Maritrema</i>         | MT328208.1-9                          | <i>Maritrema kostadinovae</i>          |
| Plagiorchiida | Microphallidae   | <i>Maritrema</i>         | KJ144178.1                            | <i>Maritrema novaezealandense</i>      |
| Plagiorchiida | Microphallidae   | <i>Maritrema</i>         | AY220630.1                            | <i>Maritrema oocysta</i>               |
| Plagiorchiida | Microphallidae   | <i>Maritrema</i>         | KJ144174.1                            | <i>Maritrema poulini</i>               |
| Plagiorchiida | Microphallidae   | <i>Maritrema</i>         | AY220631.1                            | <i>Maritrema prosthometra</i>          |
| Plagiorchiida | Microphallidae   | <i>Maritrema</i>         | MH257771.1                            | <i>Maritrema</i> sp.                   |
| Plagiorchiida | Microphallidae   | <i>Maritrema</i>         | HM584135.1; AF151926.1                | <i>Maritrema subdolum</i>              |
| Plagiorchiida | Microphallidae   | <i>Microphallus</i>      | AY220626.1                            | <i>Microphallus abortivus</i>          |
| Plagiorchiida | Microphallidae   | <i>Microphallus</i>      | AY220628.1                            | <i>Microphallus basodactylophallus</i> |
| Plagiorchiida | Microphallidae   | <i>Microphallus</i>      | HM584125.1                            | <i>Microphallus calidris</i>           |
| Plagiorchiida | Microphallidae   | <i>Microphallus</i>      | AY220633.1                            | <i>Microphallus fusiformis</i>         |
| Plagiorchiida | Microphallidae   | <i>Microphallus</i>      | KT355822.1-23                         | <i>Microphallus minutus</i>            |
| Plagiorchiida | Microphallidae   | <i>Microphallus</i>      | MG783586.1-89                         | <i>Microphallus ochotensis</i>         |
| Plagiorchiida | Microphallidae   | <i>Microphallus</i>      | HM584122.1                            | <i>Microphallus piriformes</i>         |
| Plagiorchiida | Microphallidae   | <i>Microphallus</i>      | AY220627.1                            | <i>Microphallus primas</i>             |
| Plagiorchiida | Microphallidae   | <i>Microphallus</i>      | AY220625.1; HM584137.1-38             | <i>Microphallus similis</i>            |
| Plagiorchiida | Microphallidae   | <i>Microphallus</i>      | HM584131.1,40,42; KJ868216.1          | <i>Microphallus</i> sp.                |
| Plagiorchiida | Microphallidae   | <i>Microphallus</i>      | HM584139.1                            | <i>Microphallus triangulatus</i>       |
| Plagiorchiida | Monorchidae      | <i>Palaeorchis</i>       | MT103407.1-10                         | <i>Palaeorchis incognitus</i>          |
| Plagiorchiida | Nanophyetidae    | <i>Nanophyetus</i>       | LT796169.1-70                         | <i>Nanophyetus japonensis</i>          |
| Plagiorchiida | Nanophyetidae    | <i>Nanophyetus</i>       | LN871822.1-23                         | <i>Nanophyetus salmincola</i>          |
| Plagiorchiida | Nanophyetidae    | <i>Nanophyetus</i>       | AY116873.1                            | <i>Nanophyetus salminicola</i>         |

| Order         | Super- or Family     | Genus                    | Accession Number from NCBI                           | Species                             |
|---------------|----------------------|--------------------------|------------------------------------------------------|-------------------------------------|
| Plagiorchiida | Nanophyetidae        | <i>Nanophyetus</i>       | MG966187.1; LN871818.2,21                            | <i>Nanophyetus schikobalowi</i>     |
| Plagiorchiida | Nanophyetidae        | <i>Skrjabinophyetus</i>  | AF184252.1                                           | <i>Skrjabinophyetus neomidis</i>    |
| Plagiorchiida | Omphalometridae      | <i>Omphalometra</i>      | AF300333.1                                           | <i>Omphalometra flexuosa</i>        |
| Plagiorchiida | Omphalometridae      | <b><i>Rubestrema</i></b> | MK585231.1; AY222275.1;<br>AF300331.1                | <i>Rubestrema exasperatum</i>       |
| Plagiorchiida | Orientocreadiidae    | <i>Orientocreadium</i>   | MN969621.1                                           | <i>Orientocreadium indicum</i>      |
| Plagiorchiida | Pachysolidae         | <i>Pachysolus</i>        | AY222274.1                                           | <i>Pachysolus irroratus</i>         |
| Plagiorchiida | <u>Plagiorchiida</u> | <i>Aptorchis</i>         | EU334369.1                                           | <i>Aptorchis aequalis</i>           |
| Plagiorchiida | <u>Plagiorchiida</u> | <i>Aptorchis</i>         | EF014729.1                                           | <i>Aptorchis aequalis</i>           |
| Plagiorchiida | <u>Plagiorchiida</u> | <i>Aptorchis</i>         | EF014730.1                                           | <i>Aptorchis megacetabulus</i>      |
| Plagiorchiida | <u>Plagiorchiida</u> | <i>Aptorchis</i>         | EF014727.1                                           | <i>Aptorchis megapharynx</i>        |
| Plagiorchiida | <u>Plagiorchiida</u> | <i>Aptorchis</i>         | EF014728.1                                           | <i>Aptorchis pearsoni</i>           |
| Plagiorchiida | <u>Plagiorchiida</u> | <i>Aptorchis</i>         | AM932523.1                                           | <i>Aptorchis sp.</i>                |
| Plagiorchiida | Plagiorchiidae       | <i>Astiotrema</i>        | AF184253.1                                           | <i>Astiotrema monticellii</i>       |
| Plagiorchiida | Plagiorchiidae       | <i>Choledocystus</i>     | AY875679.1; HM137617.1                               | <i>Choledocystus hepatica</i>       |
| Plagiorchiida | Plagiorchiidae       | <i>Choledocystus</i>     | MK648310.1                                           | <i>Choledocystus sp.</i>            |
| Plagiorchiida | Plagiorchiidae       | <i>Haplometra</i>        | AF151933.1                                           | <i>Haplometra cylindracea</i>       |
| Plagiorchiida | Plagiorchiidae       | <i>Macrodera</i>         | MK585199.1; AF151913.1                               | <i>Macrodera longicollis</i>        |
| Plagiorchiida | Plagiorchiidae       | <i>Metaleptophallus</i>  | AF151912.1                                           | <i>Metaleptophallus gracillimus</i> |
| Plagiorchiida | Plagiorchiidae       | <b><i>Neoglyphe</i></b>  | AF300329.1; AF300330.1                               | <i>Neoglyphe sobolevi</i>           |
| Plagiorchiida | Plagiorchiidae       | <b><i>Neoglyphe</i></b>  | MW730784.1-91                                        | <i>Neophasis anarrichae</i>         |
| Plagiorchiida | Plagiorchiidae       | <i>Paralepoderma</i>     | AF151910.1; MK585218.1                               | <i>Paralepoderma cloacicola</i>     |
| Plagiorchiida | Plagiorchiidae       | <i>Plagiorchiidae</i>    | MK321658.1,72                                        | <i>Plagiorchiidae sp.</i>           |
| Plagiorchiida | Plagiorchiidae       | <i>Plagiorchis</i>       | MW528601.1; KJ533392.1-93;<br>AF151911.1; KF556678.1 | <i>Plagiorchis elegans</i>          |
| Plagiorchiida | Plagiorchiidae       | <i>Plagiorchis</i>       | KJ533394.1; AF151930.1                               | <i>Plagiorchis koreanus</i>         |

| Order         | Super- or Family | Genus                   | Accession Number from NCBI                                                   | Species                                |
|---------------|------------------|-------------------------|------------------------------------------------------------------------------|----------------------------------------|
| Plagiorchiida | Plagiorchiidae   | <i>Plagiorchis</i>      | MW528602.1; KJ533395.1;<br>MK641807.1                                        | <i>Plagiorchis maculosus</i>           |
| Plagiorchiida | Plagiorchiidae   | <i>Plagiorchis</i>      | MW528603.1; AF184250.1                                                       | <i>Plagiorchis muelleri</i>            |
| Plagiorchiida | Plagiorchiidae   | <i>Plagiorchis</i>      | KJ533397.1                                                                   | <i>Plagiorchis neomidis</i>            |
| Plagiorchiida | Plagiorchiidae   | <i>Plagiorchis</i>      | MW528604.1-14,16-26;<br>KY513159.1-62,66,68-74;<br>KJ533398.1; LC599522.1-25 | <i>Plagiorchis</i> sp.                 |
| Plagiorchiida | Plagiorchiidae   | <i>Plagiorchis</i>      | AF151931.1                                                                   | <i>Plagiorchis vespertilionis</i>      |
| Plagiorchiida | Plagiorchiidae   | <i>Skrjabinoeces</i>    | AY222279.1                                                                   | <i>Skrjabinoeces similis</i>           |
| Plagiorchiida | Plagiorchiidae   | <i>Glypthelmins</i>     | AY875678.1                                                                   | <i>Glypthelmins poncedeleoni</i>       |
| Plagiorchiida | Plagiorchiidae   | <i>Glypthelmins</i>     | MN969622.1-23                                                                | <i>Glypthelmins</i> sp.                |
| Plagiorchiida | Plagiorchiidae   | <i>Leptophallus</i>     | OL675865.1; AF151914.1                                                       | <i>Leptophallus nigrovenosus</i>       |
| Plagiorchiida | Plagiorchiidae   | <i>Rauschiella</i>      | HM137620.1; AY875677.1                                                       | <i>Rauschiella tineri</i>              |
| Plagiorchiida | Plagiorchiidae   | <i>Sigmapera</i>        | EF411200.1                                                                   | <i>Sigmapera cincta</i>                |
| Plagiorchiida | Plagiorchiidae   | <i>Travtrema</i>        | MW317228.1-29                                                                | <i>Travtrema stenocotyle</i>           |
| Plagiorchiida | Pleurogenidae    | <i>Collyricloides</i>   | KP682451.1                                                                   | <i>Collyricloides massanae</i>         |
| Plagiorchiida | Pleurogenidae    | <i>Parabascus</i>       | AY220618.1; MN726967.1                                                       | <i>Parabascus duboisi</i>              |
| Plagiorchiida | Pleurogenidae    | <i>Parabascus</i>       | AY220619.1                                                                   | <i>Parabascus joannae</i>              |
| Plagiorchiida | Pleurogenidae    | <i>Parabascus</i>       | AF151923.1                                                                   | <i>Parabascus semisquamosus</i>        |
| Plagiorchiida | Pleurogenidae    | <i>Pleurogenidae</i>    | MN726968.1-70                                                                | <i>Pleurogenidae</i> gen. sp.          |
| Plagiorchiida | Pleurogenidae    | <i>Pleurogenoides</i>   | AF433670.1                                                                   | <i>Pleurogenoides medians</i>          |
| Plagiorchiida | Pleurogenidae    | <i>Prosotocus</i>       | AY220623.1                                                                   | <i>Prosotocus confusus</i>             |
| Plagiorchiida | Pleurogenidae    | <i>Allassogonoporus</i> | AF151924.1                                                                   | <i>Allassogonoporus amphoraeformis</i> |
| Plagiorchiida | Pleurogenidae    | <i>Pleurogenes</i>      | AF151925.1                                                                   | <i>Pleurogenes claviger</i>            |
| Plagiorchiida | Pleurogenidae    | <i>Pleurogenes</i>      | MK342571.1                                                                   | <i>Pleurogenes</i> sp.                 |
| Plagiorchiida | Pleurogenidae;   | <i>Brandesia</i>        | AY220622.1                                                                   | <i>Brandesia turgida</i>               |
| Plagiorchiida | Pleurogenidae;   | <i>Brandesia</i>        | MT260148.1                                                                   | <i>Brandesia turgida</i>               |
| Plagiorchiida | Prosthogonimidae | <i>Prosthogonimus</i>   | AY220634.1                                                                   | <i>Prosthogonimus cuneatus</i>         |

| Order         | Super- or Family  | Genus                   | Accession Number from NCBI                           | Species                               |
|---------------|-------------------|-------------------------|------------------------------------------------------|---------------------------------------|
| Plagiorchiida | Prosthogonimidae  | <i>Prosthogonimus</i>   | AF151928.1; MW114967.1-70;<br>MN726971.1-75          | <i>Prosthogonimus ovatus</i>          |
| Plagiorchiida | Prosthogonimidae  | <i>Schistogonimus</i>   | AY116869.1                                           | <i>Schistogonimus rarus</i>           |
| Plagiorchiida | Reniferidae       | <i>Lechriorchis</i>     | JF820601.1-03; JF820599.1                            | <i>Lechriorchis tygarti</i>           |
| Plagiorchiida | Reniferidae       | <i>Lechriorchis</i>     | AF151932.1                                           | <i>Lecithopyge rastellus</i>          |
| Plagiorchiida | Reniferidae       | <i>Ochetosoma</i>       | AF433671.1                                           | <i>Ochetosoma kansense</i>            |
| Plagiorchiida | Reniferidae       | <i>Renifer</i>          | HQ665459.1                                           | <i>Renifer aniarum</i>                |
| Plagiorchiida | Reniferidae       | <i>Renifer</i>          | LC557508.1-12                                        | <i>Renifer kansensis</i>              |
| Plagiorchiida | Reniferidae       | <i>Dasymetra</i>        | AF433672.1                                           | <i>Dasymetra nicolli</i>              |
| Plagiorchiida | Stomylotrematidae | <i>Stomylotrema</i>     | KY982863.1                                           | <i>Stomylotrema vicarium</i>          |
| Plagiorchiida | Telorchidae       | <i>Opisthioglyphe</i>   | MK585341.1-46; AF151929.1                            | <i>Opisthioglyphe ranae</i>           |
| Plagiorchiida | Telorchidae       | <i>Telorchis</i>        | AF151915.1                                           | <i>Telorchis assula</i>               |
| Plagiorchiida | Telorchidae       | <i>Telorchis</i>        | JF820592.1                                           | <i>Telorchis bonnerensis</i>          |
| Plagiorchiida | Telorchidae       | <i>Telorchis</i>        | OL960085.1                                           | <i>Telorchis sp.</i>                  |
| Plagiorchiida | Troglotrematidae  | <i>Paragonimus</i>      | HM172616.1                                           | <i>Paragonimus harinasutai</i>        |
| Plagiorchiida | Troglotrematidae  | <i>Paragonimus</i>      | DQ836249.1; HM172615.2,17                            | <i>Paragonimus heterotremus</i>       |
| Plagiorchiida | Troglotrematidae  | <i>Paragonimus</i>      | AY116875.1                                           | <i>Paragonimus iloktsuenensis</i>     |
| Plagiorchiida | Troglotrematidae  | <i>Paragonimus</i>      | HQ900670.1                                           | <i>Paragonimus kellicotti</i>         |
| Plagiorchiida | Troglotrematidae  | <i>Paragonimus</i>      | HM172618.1                                           | <i>Paragonimus macrorchis</i>         |
| Plagiorchiida | Troglotrematidae  | <i>Paragonimus</i>      | HM172619.1                                           | <i>Paragonimus mexicanus</i>          |
| Plagiorchiida | Troglotrematidae  | <i>Paragonimus</i>      | HM172620.1                                           | <i>Paragonimus miyazakii</i>          |
| Plagiorchiida | Troglotrematidae  | <i>Paragonimus</i>      | HM172621.1                                           | <i>Paragonimus ohirai</i>             |
| Plagiorchiida | Troglotrematidae  | <i>Paragonimus</i>      | HM004189.1                                           | <i>Paragonimus pseudoheterotremus</i> |
| Plagiorchiida | Troglotrematidae  | <i>Paragonimus</i>      | JQ322628.1-29                                        | <i>Paragonimus siamensis</i>          |
| Plagiorchiida | Troglotrematidae  | <i>Paragonimus</i>      | AY116874.1; DQ836244.1,47;<br>JN656173.1-75,78-79,81 | <i>Paragonimus westermani</i>         |
| Plagiorchiida | Troglotrematidae  | <i>Troglotrema</i>      | MW404388.1                                           | <i>Troglotrema acutum</i>             |
| Plagiorchiida | Troglotrematidae  | <i>Troglotrematidae</i> | AB521803.1                                           | <i>Troglotrematidae sp.</i>           |
| Plagiorchiida | Unclassified      | <i>Xiphidiata</i>       | LC600287.1                                           | <i>Xiphidiata sp.</i>                 |

| Order         | Super- or Family | Genus                    | Accession Number from NCBI                   | Species                            |
|---------------|------------------|--------------------------|----------------------------------------------|------------------------------------|
| Plagiorchiida | Urotrematidae    | <i>Urotrema</i>          | MK477547.1                                   | <i>Urotrema minuta</i>             |
| Plagiorchiida | Urotrematidae    | <i>Urotrema</i>          | MK477545.1-46                                | <i>Urotrema scabridum</i>          |
| Plagiorchiida | Urotrematidae    | <i>Urotrema</i>          | MK477548.1-49                                | <i>Urotrema shirleyae</i>          |
| Plagiorchiida | Lissorchiidae    | <i>Lissorchis</i>        | MT928353.1                                   | <i>Lissorchis cf. gullaris</i>     |
| Plagiorchiida | Lissorchiidae    | <i>Lissorchis</i>        | MT928354.1                                   | <i>Lissorchis cf. nelsoni</i>      |
| Plagiorchiida | Lissorchiidae    | <i>Lissorchis</i>        | EF032689.1; AY222250.1,<br>MT928329.1        | <i>Lissorchis kritskyi</i>         |
| Plagiorchiida | Macroderoididae  | <i>Paramacroderoides</i> | MH041375.1                                   | <i>Paramacroderoides echinus</i>   |
| Plagiorchiida | Macroderoididae  | <i>Paramacroderoides</i> | HM137661.1,64                                | <i>Paramacroderoides kinsellai</i> |
| Plagiorchiida | Macroderoididae  | <i>Perezitrema</i>       | KU535686.1                                   | <i>Perezitrema bychowskyi</i>      |
| Unclassified  | Unclassified     | Trematoda                | MH094412.1,13-15,19-<br>23,32,34; LC599542.1 | <i>Trematoda sp.</i>               |
